# Supplementary material for: Nativity of lignin carbohydrate bonds substantiated by biomimetic synthesis
Source: PubMed Central journal article supplement — J Exp Bot. 2019 Jul 10;70(20):5591–601. doi: 10.1093/jxb/erz324 (PMC6812735; doi:10.1093/jxb/erz324), 2019-07-10
Supplement: erz324_suppl_supplementary_figures_s1-s3.pdf [file erz324_suppl_supplementary_figures_s1-s3.pdf]

# SUPPLEMENTARY INFORMATION

## Nativity of Lignin Carbohydrate Bonds substantiated by Biomimetic Synthesis

Nicola Giummarella <sup>1a</sup>, Sanna Koutaniemi <sup>2</sup>, Mikhail Balakshin<sup>3a</sup>, Anna Kärkönen<sup>4,5\*</sup> and Martin Lawoko<sup>1\*</sup>

<sup>1</sup> Fiber and Polymer Technology, Wallenberg Wood Science Center, Royal Institute of Technology, Stockholm, Sweden; <sup>2</sup> Department of Food and Environmental Chemistry, University of Helsinki, Finland; <sup>3</sup> Department of Bioproducts and Biosystems, Aalto University, Finland; <sup>4</sup> Department of Agricultural Sciences, Viikki Plant Science Centre, University of Helsinki, Finland; <sup>5</sup> Natural Resources Institute Finland, Production Systems, Plant Genetics, Helsinki, Finland; \* Corresponding Authors. <sup>a</sup> equally contributed.

### List of Figures legends

- **Figure S1.** Analysis by Size exclusion chromatography (SEC) in DMSO +0.5% LiBr of Norway spruce extracellular lignin (ECL)
- **Figure S2.** Expanded HSQC spectrum of beech methylglucuronoxylan.
- **Figure S3.** Expanded HSQC spectrum of DHP produced with HRP in the presence of galacturonate (GalA-DHP).

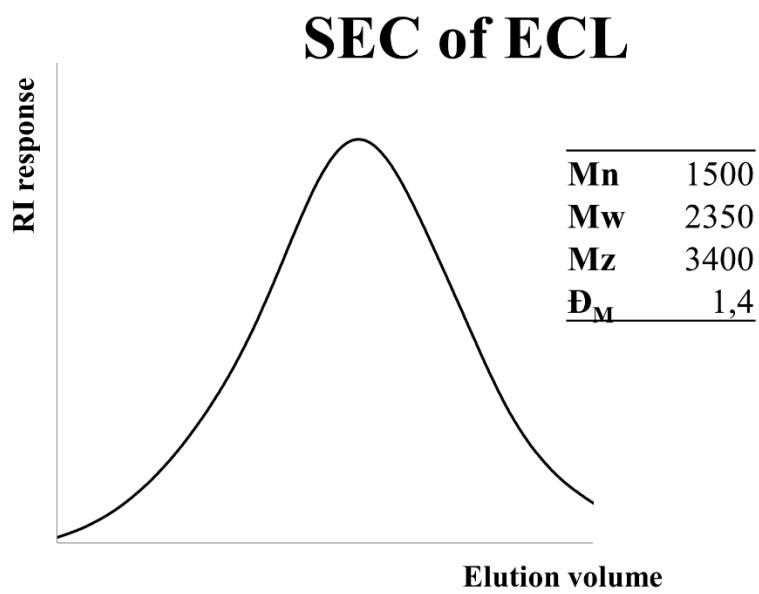

**Figure S1.** Analysis by Size Exclusion Chromatography (SEC) in DMSO +0.5% LiBr of Norway spruce extracellular lignin (ECL).

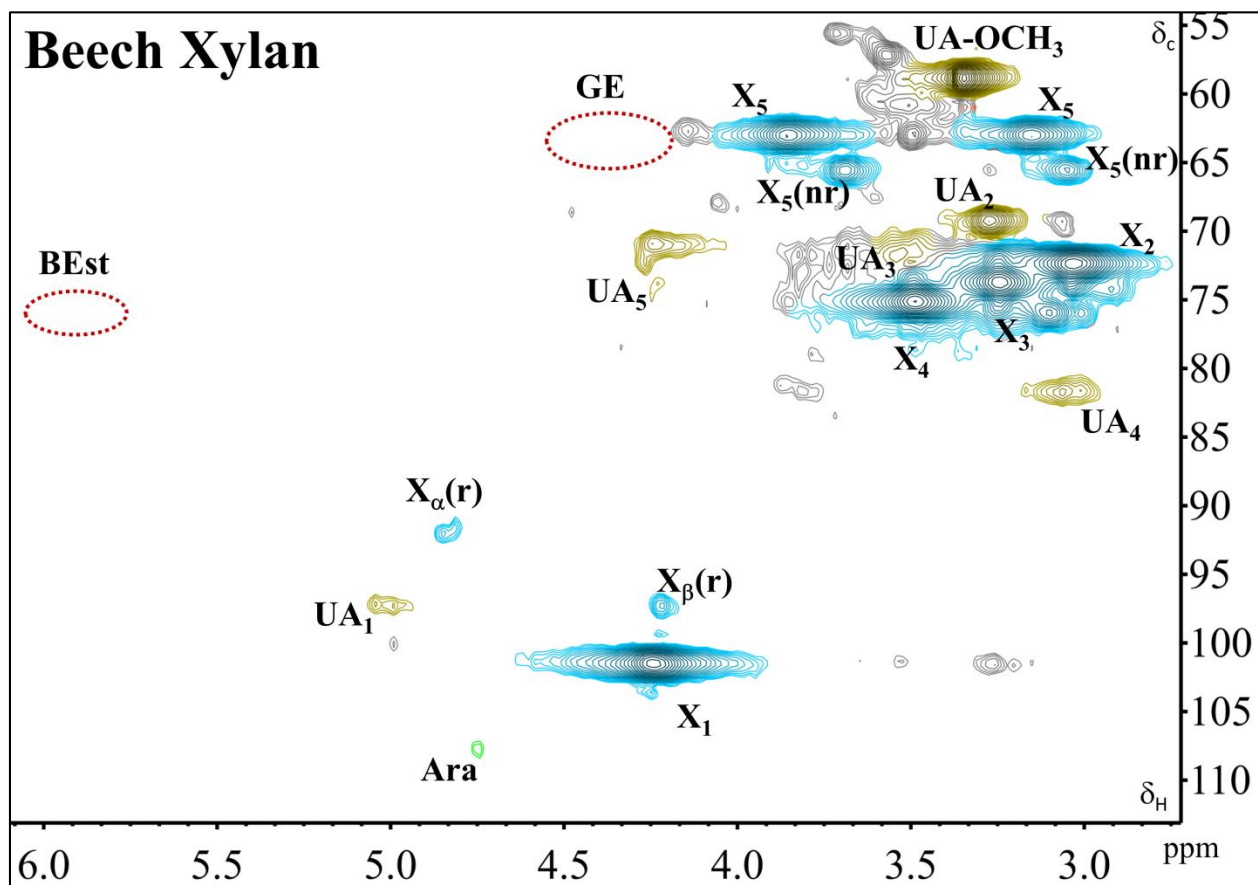

**Figure S2.** Expanded HSQC spectrum of beech methylglucuronoxylan.
